# Supplementary material for: Neuropathology of the Basal Ganglia in SNCA Transgenic Rat Model of Parkinson’s Disease: Involvement of Parvalbuminergic Interneurons and Glial-Derived Neurotropic Factor
Source: MDPI journal article supplement (doi:10.3390/ijms231710126), 2022-09-04
Supplement: s1 [file s1]

## Supplementary figure

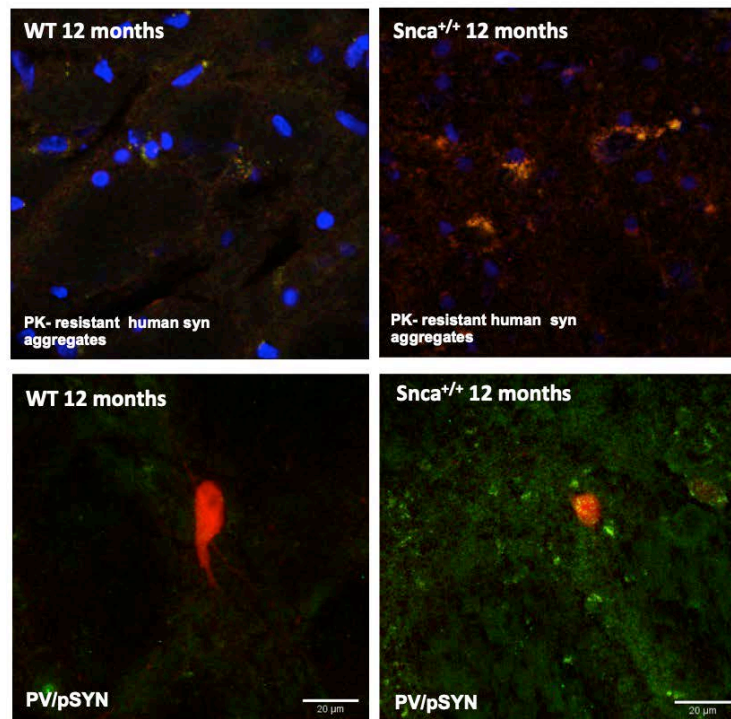

**Supplementary Figure S1.** Confocal microscope immunofluorescence images show the presence of PK-resistant human syn aggregates only in the 12 months old Snca<sup>+/-</sup> rats. The 12 months old Snca<sup>+/-</sup> also have the phosphorylated form of human Syn in PV+GABAergic Interneurons.
